# Supplementary material for: Plasmon–exciton coupling dynamics and plasmonic lasing in a core–shell nanocavity
Source: Royal Society of Chemistry journal article supplement (doi:10.1039/d0nr08969a), 2021-01-01
Supplement: d0nr08969a1.pdf [file d0nr08969a1.pdf]

Electronic Supporting Information

**Plasmon-exciton Coupling Dynamics and Plasmonic  
Lasing in Core-shell Nanocavity**

Ru Wang, Chunxiang Xu\*, Daotong You, Xiaoxuan Wang, Jinping Chen, Zengliang

Shi, Qiannan Cui, and Teng Qiu\*

*State Key Laboratory of Bioelectronics, School of Physics, Southeast University, Nanjing*

*210096, P. R. China*

| <b>CONTENTS</b>                                              | <b>PAGE</b> |
|--------------------------------------------------------------|-------------|
| 1. The characteristics of modes                              | S2          |
| 2. The ZnO/Al core-shell structure of different Al thickness | S3          |
| 3. The threshold material gain and the Purcell factor        | S4          |
| 4. Temperature-dependent PL spectra                          | S4          |
| 5. The lasing spectra                                        | S4          |
| 6. Rate equation analysis                                    | S5          |
| 7. References                                                | S6          |

### The characteristics of modes

$A_m$  is the effective mode area,  $L_p$  is the propagation length, and  $\Gamma_{wg}$  is the waveguide confinement factor<sup>1-5</sup>

$$A_m = \iint W(r) d^2r / \max \{W_m(r)\} \quad (1)$$

$$L_p = 1 / [2 \text{Im}(k_z)] \quad (2)$$

$$\Gamma_{wg} = (n_a / 2\eta_0) \int_{A_a} |E(\rho)|^2 d\rho / P_z \quad (3)$$

Where the denominator and numerator of  $A_m$  are the ratio of the total mode energy  $W(r)$  and its peak energy density  $\max\{W_m(r)\}$ , respectively.  $k_z$  is the imaginary part of the mode propagation constant;  $E(\rho)$  is the electric field expressed in cylindrical coordinates;  $P_z$  is the power flow in the propagation direction;  $n_a$  is the refractive index of the gain medium;  $A_a$  is the region of the gain medium; and  $\eta_0$  is the intrinsic impedance. Figure. S1(a),(b) show the characteristics (propagation distance, waveguide confinement factor) of modes in Fig.1(d)-(g) as functions of the diameter of ZnO nanorod.

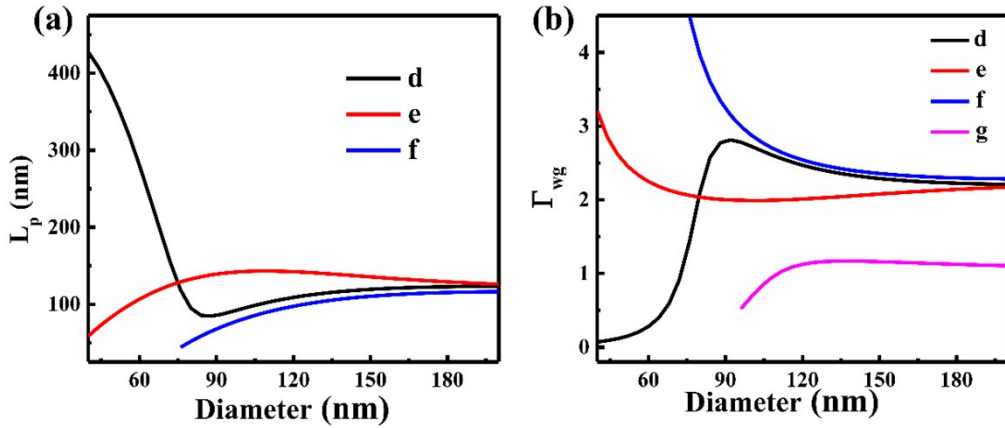

Figure S1 When the Al thickness is 15 nm, the characteristics of modes as functions of the diameter of ZnO nanorod. (a)The propagation length. (b) The waveguide confinement factor.

### The ZnO/Al core-shell structure of different Al thickness

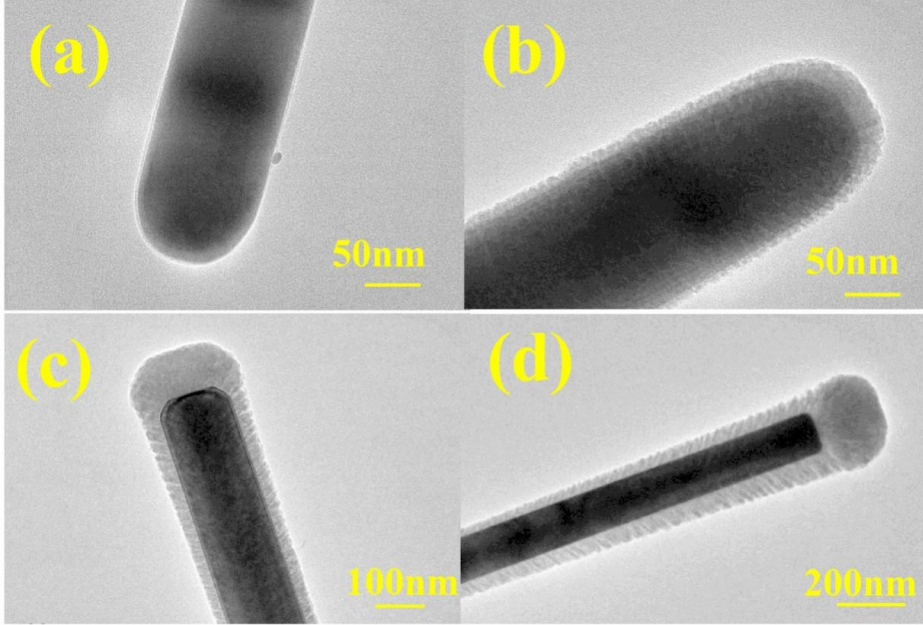

Figure S2 TEM image of ZnO/Al core-shell plasmonic nanolaser with sputtering Al layer time of ~5 min, ~10 min, ~15min, ~20 min. (a)-(d) ZnO/Al core-shell plasmonic nanolaser for different Al layer thickness of ~5 nm, ~15 nm, ~30 nm, ~50 nm, respectively.

### The threshold material gain and the Purcell factor

The threshold material gain  $g_{th}$  can be related to the photon lifetime  $\tau_p$  by Formula (4). The Q of the cavity can be theoretically calculated by the following Formula<sup>1,3-5</sup>.

$$\frac{1}{\tau_p} = v(\omega)\Gamma_{wg}g_{th} = v(\omega)\left[\alpha + \frac{1}{2L}\ln\left(\frac{1}{R_1R_2}\right)\right] \quad (4)$$

$$\frac{1}{Q} = \frac{1}{\tau_p\omega} = \frac{v(\omega)}{\omega}\left[\alpha + \frac{1}{L}\ln\left(\frac{1}{R_1R_2}\right)\right] = \frac{1}{Q_{abs}} + \frac{1}{Q_{mir}} \quad (5)$$

$$\frac{1}{Q_{abs}} = \frac{v(\omega)\alpha}{\omega} \quad (6)$$

$$\frac{1}{Q_{mir}} = \frac{v(\omega)}{\omega} \frac{1}{2L}\ln\left(\frac{1}{R_1R_2}\right) \quad (7)$$

Where  $v(\omega)$  is close to the material group velocity of the semiconductor material, which is related to frequency  $\omega$ . L is c-axial length of nanorods and  $R_1$ ,  $R_2$  are two end face reflectivity of the ZnO/Al core-shell structure, respectively.  $Q_{abs}$  is an inverse

relationship with modal loss  $\alpha$  from the Formula (6). So  $Q_{\text{abs}}$  increases with the increase of Al thickness in Figure. S3(b) black curve.  $Q_{\text{mir}}$  is an inverse relationship with mirror loss in the Formula (7). As shown in Figure. S3(b) blue curve, the  $Q_{\text{mir}}$  increase with the increase of the Al thickness. Figure. S3(a) is effective mode area in different Al thickness. The effective mode area decrease corresponding to the increase of Al thickness. it presents that the thicker Al layer can enhance optical confinement. Thus, the Purcell factor  $F_p$  and exciton recombination rate increases with the increase of the Al thickness.

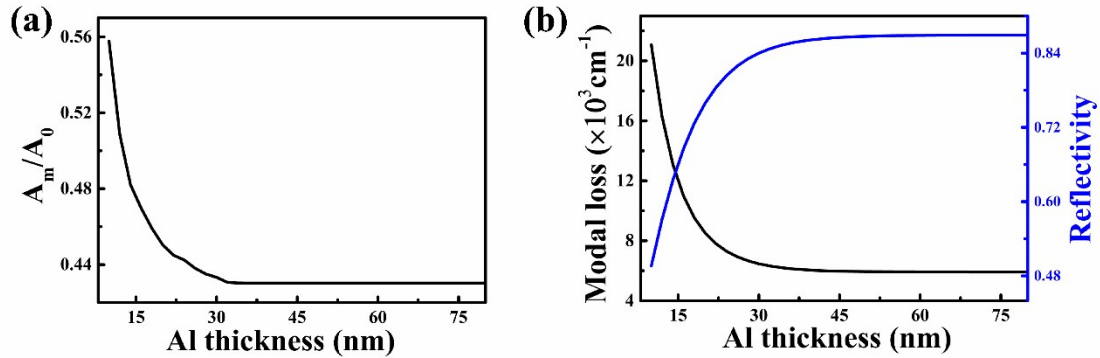

Figure S3 When the diameter of ZnO nanorod is 200 nm, the dependence of mode characteristics and different Al thickness. (a) The effective mode area. (b) The modal loss (blue line), the reflectivity of 378nm emitting light (black line).

### Temperature-dependent PL spectra

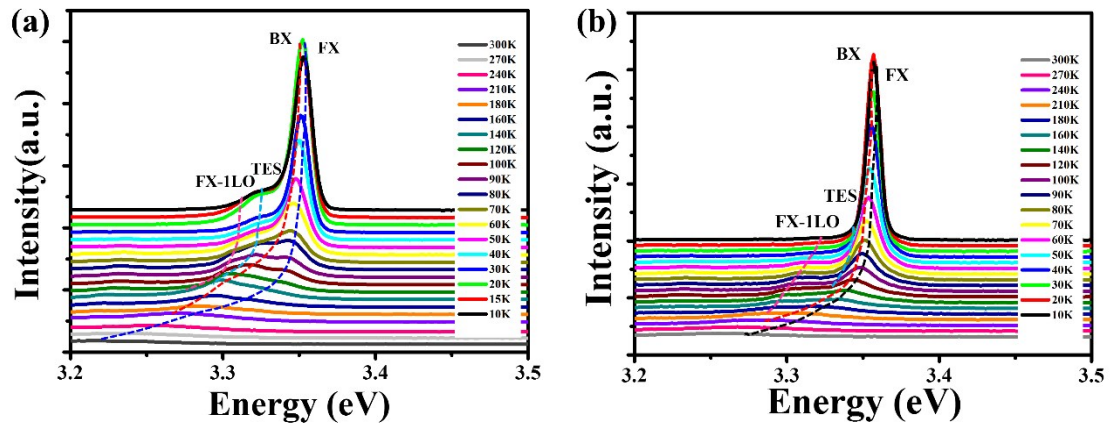

Figure S4 Temperature-dependent PL spectra. (a) ZnO photonic structure and (b) the ZnO/Al core-shell plasmonic structure.

## The lasing spectra

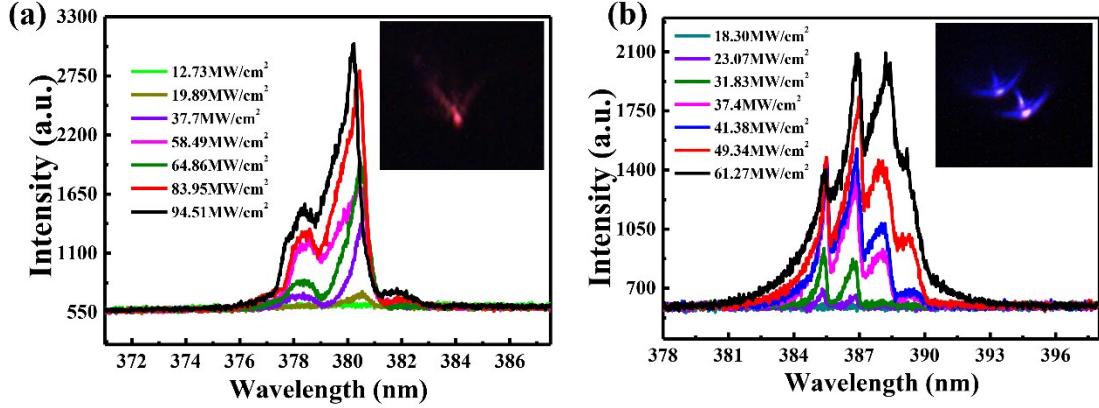

Figure S5 The lasing spectra under different pumping power density. (a) the ZnO/Al core-shell plasmonic nanolaser. (b) ZnO photonic nanolaser. The inset on the right correspond to microscope images of nanolasers, where the scattered light output is from the end facets.

## Rate equation analysis

The rate equations are<sup>5</sup>:

$$\frac{dn}{dt} = p - An - \beta\Gamma As(n - n_0) \quad (8)$$

$$\frac{ds}{dt} = \beta An + \beta\Gamma As(n - n_0) - \gamma s \quad (9)$$

Here,  $p$  is a pump rate,  $s$  is photon number of emitted laser mode,  $n$  is excited electronic state population,  $n_0$  is the excited state population at transparency.  $\beta$  is the spontaneous emission factor.  $\gamma$  is the total cavity mode loss rate and  $\Gamma$  is the overlap factor quantifying the spatial distribution of gain relative to the laser mode.

$\gamma_g = \beta\Gamma Asn_0$  is the absorption rate due to the gain medium,  $A$  is spontaneous emission rate.

From the rate equations in steady state, the photon number is described by the following equation.

$$\gamma s = \frac{1}{2} \left( p - p_{ph}^{(n)} \right) + \frac{1}{2} \left( p + p_{ph}^{(n)} \right) \left[ 1 - \frac{4}{P} \frac{(1-\beta)An_\infty}{\left( 1 + p_{ph}^{(n)} / p \right)^2} \right]^{1/2} \quad (10)$$

Here,  $p_{th}^{(n)} = (\gamma + (1-\beta)\gamma_g) / \beta\Gamma$ ,  $n_\infty = (\gamma + \gamma_g) / \beta\Gamma A$ .

## REFERENCES

1. S.-W. Chang, T.-R. Lin and S. L. Chuang, *Opt. Express* **2010**, *18*, 15039-15053.
2. Y.-H. Chou, B.-T. Chou, C.-K. Chiang, Y.-Y. Lai, C.-T. Yang, H. Li, T.-R. Lin, C.-C. Lin, H.-C. Kuo, S.-C. Wang and T.-C. Lu, *ACS Nano* **2015**, *9*, 3978-3983.
3. S.-W. Chang and S. L. Chuang, *Ieee J.Quantum Elect.* **2009**, *45*, 1004-1013..
4. R.-M. Ma and R. F. Oulton, *Nat. Nanotechnol.* **2019**, *14*, 12-22.
5. R.-M. Ma, R. F. Oulton, V. J. Sorger and X. Zhang, *Laser Photonics Rev.* **2013**, *7*, 1-21.1.
